# Supplementary material for: Surface-Related Features and Virulence Among Acinetobacter baumannii Clinical Isolates Belonging to International Clones I and II
Source: Front Microbiol. 2019 Jan 8;9:3116. doi: 10.3389/fmicb.2018.03116 (PMC6331429; doi:10.3389/fmicb.2018.03116)
Supplement: Supplementary file 1 [file Table_1.xlsx]

## Sheet: Sheet1
							Supplementary Material
							Surface-related features and virulence among Acinetobacter baumannii clinical isolates belonging to international clone I and II
	Jūratė Skerniškytė*, Renatas Krasauskas, Christine Péchoux, Saulius Kulakauskas, Julija Armalytė and Edita Sužiedėlienė
	* Correspondence: Jūratė Skerniškytė, jurate.skerniskyte@gf.vu.lt
Supplementary Table S1. Characteristics of clinical A. baumannii isolates.
Representative isolates of pulsotype (number of isolates in pulsotype)		Hospital	Surface related properties												Antibiotic susceptibility
			Swarming motility (mm)	Twitching motility (mm)	Pellicle (OD600)	CPS profile	SAT (M)	Biofilm formation (OD580/600)	Adhesion to polystyrene (OD580/600)	Desiccation (D%)*	Adhesion to murine lung epithelial cells (A%)*	Phagocytosis by macrophages (P%)	Resistance to FBS	C. elegans progeny counts	SCF-105	MEM-10	TZP-10	SAM-20	CAZ-30	GM-10	KAN-30	CIP-5	IPM-10	PIP--10
IC I
I-a	(47)	A	12.4±1.9	27.1±6.2	0.668±0.152	VM	0.5	0.989±0.359	0.251±0.073	0.056±0.003	0.802±0.222	0.058±0.038	R	nd	R	S	R	R	R	R	R	R	S	R
I-aC		C	11.8±1.9	23.6±3.8	0.819±0.167	VM	0.5	3.385±0.592	0.544±0.043	0.011±0.001	0.557±0.266	0.020±0.005	R	nd	S	S	nd	nd	R	R	R	R	S	nd
I-b	(6)	A	12.3±2.9	25.1±2.1	0.508±0.048	VM	0.5	1.253±0.432	0.346±0.032	0.040±0.015	0.446±0.185	0.017±0.003	R	nd	R	S	R	R	R	R	S	R	S	R
I-c	(16)	A	11.3±0.5	25.9±3.3	0.627±0.025	VM	0.5	0.997±0.227	0.543±0.175	0.013±0.001	0.694±0.230	0.017±0.003	R	nd	R	R	R	S	R	R	R	R	R	S
I-d	(20)	A	11.2±2.2	0.0±0.0	0.631±0.122	VM	0.5	1.581±0.265	0.482±0.111	0.069±0.031	0.547±0.235	0.059±0.040	R	nd	S	S	S	S	R	R	R	R	S	R
I-dB		B	10.8±1.9	26.3±4.0	0.494±0.056	VM	0.25	1.732±0.107	0.367±0.102	0.005±0.003	0.631±0.318	0.080±0.042	R	nd	R	S	R	S	R	R	R	R	S	R
I-e	(36)	A	9.8±2.3	25.5±0.9	0.000±0.000	VM	0.5	0.747±0.392	0.358±0.086	0.150±0.100	0.749±0.307	0.094±0.041	R	nd	S	S	R	R	R	R	R	R	S	R
I-f	(24)	A	9.3±0.7	20.4±1.2	0.027±0.047	VM	1	0.651±0.148	0.327±0.123	0.134±0.016	0.856±0.434	0.083±0.043	R	nd	S	S	R	R	R	R	R	R	R	R
I-g	(10)	A	10.0±2.1	29.0±3.6	0.069±0.041	VM	0.5	1.014±0.237	0.279±0.098	0.378±0.212	0.472±0.221	0.015±0.008	R	nd	R	S	R	R	R	nd	nd	R	S	R
I-gB		B	8.2±0.2	20.7±1.7	0.000±0.000	VM	0.5	2.888±0.776	0.453±0.133	0.040±0.026	0.418±0.302	0.044±0.032	R	nd	R	S	R	S	R	R	R	R	S	R
I-h	(1)	A	10.2±0.8	27.7±4.2	0.553±0.138	VM	0.5	1.026±0.263	0.325±0.208	0.191±0.127	0.484±0.161	0.014±0.006	R	nd	S	S	S	R	R	R	R	R	S	R
I-i	(2)	A	11.3±1.1	20.6±3.2	0.129±0.044	VM	0.5	1.423±0.575	0.435±0.089	0.716±0.483	0.459±0.181	0.104±0.010	R	nd	nd	S	R	R	R	R	R	R	S	R
I-j	(1)	A	26.2±1.1	51.0±3.1	0.489±0.111	VM	0.5	5.502±0.810	0.272±0.074	0.026±0.007	0.795±0.282	0.014±0.001	R	nd	nd	S	S	R	R	R	R	nd	S	nd
I-k	(1)	A	14.1±2.8	0.0±0.0	0.025±0.040	VM	0.5	1.046±0.348	0.384±0.111	2.750±1.750	0.551±0.125	0.055±0.023	R	nd	R	S	S	R	R	R	R	R	S	R
I-m	(1)	A	28.5±4.9	20.6±1.8	0.372±0.079	VM	0.5	1.024±0.585	0.052±0.042	0.949±0.353	0.327±0.114	0.007±0.007	R	nd	S	S	S	S	nd	R	R	R	S	R
I-n	(1)	A	11.1±1.3	26.8±4.3	0.435±0.119	VM	1	1.021±0.132	0.390±0.132	1.183±0.480	0.651±0.253	0.116±0.003	R	nd	S	S	R	R	R	R	R	R	S	R
I-o	(1)	A	11.3±1.7	33.3±4.6	0.027±0.028	VM	0.5	0.757±0.042	0.275±0.080	0.805±0.431	0.434±0.131	0.054±0.025	R	nd	R	S	R	R	R	R	R	R	S	R
I-p	(2)	A	13.0±2.7	31.0±3.5	0.076±0.016	VM	0.5	1.023±0.324	0.161±0.053	0.017±0.005	0.585±0.302	0.020±0.032	R	nd	R	S	R	R	R	R	R	R	S	R
I-u1	(26)	B	11.9±0.7	4.2±7.3	0.000±0.000	VM	0.5	1.502±0.435	0.553±0.009	0.081±0.008	0.359±0.144	0.084±0.088	R	nd	R	S	R	R	R	R	R	R	S	R
IV	(13)	B	27.0±2.5	0.0±0.0	0.064±0.109	VM	0.5	0.662±0.313	0.625±0.023	0.013±0.006	0.564±0.305	0.126±0.146	R	nd	R	R	R	R	R	R	R	R	R	R
Total:
20	(208)
IC II
II-a	(40)	A	9.3±1.1	0.0±0.0	0.003±0.001	HM	0.5	2.517±0.660	0.940±0.179	0.404±0.136	1.431±0.500	0.013±0.002	R	102.20±17.48	S	R	R	R	R	S	R	R	R	R
II-a1	(6)	B	9.1±0.3	0.0±0.0	0.002±0.001	HM	0.5	2.217±0.186	0.870±0.212	1.293±0.293	1.461±0.720	0.032±0.036	R	74.25±21.26	R	R	R	S	R	R	R	R	R	R
II-a1C		C	9.6±1.3	0.0±0.0	0.004±0.001	HM	0.5	1.505±0.275	1.034±0.276	0.337±0.078	1.464±0.750	0.078±0.053	R	74.25±13.02	S	R	nd	nd	R	R	R	R	R	nd
II-a2	(12)	B	9.8±1.2	9.6±8.4	0.005±0.001	HM	> 2	1.627±0.210	0.703±0.086	0.428±0.253	2.267±0.867	0.040±0.013	R	61.33±10.01	R	R	R	S	R	R	R	R	R	R
II-a3	(22)	C	10.2±1.0	0.0±0.0	0.003±0.001	HM	0.5	1.230±0.302	0.763±0.225	0.553±0.280	0.814±0.266	0.067±0.048	R	82.75±13.04	S	R	nd	nd	R	R	R	R	R	nd
II-b	(8)	A	10.2±1.0	0.0±0.0	0.004±0.001	HM	0.5	2.804±0.528	0.767±0.218	0.813±0.469	0.941±0.289	0.131±0.095	R	72.25±18.87	S	R	R	S	R	R	R	R	R	R
II-c	(14)	A	10.2±1.4	0.0±0.0	0.004±0.001	HM	2	2.805±1.106	0.893±0.289	2.541±0.128	1.817±0.563	0.009±0.007	R	51.00±3.6	S	R	R	S	R	S	R	R	R	R
II-d	(48)	A	9.4±0.5	0.0±0.0	0.004±0.001	HM	2	0.178±0.047	0.207±0.127	2.530±0.475	1.925±0.936	0.006±0.002	R	32.75±12.52	S	R	R	S	R	S	S	R	R	R
II-dB		B	12.0±3.1	0.0±0.0	0.074±0.008	Absent	2	0.274±0.270	0.103±0.061	5.374±2.429	0.648±0.178	0.402±0.054	S	93.75±15.75	R	R	R	S	R	R	R	R	R	R
II-e	(2)	A	6.7±1.0	0.0±0.0	0.003±0.001	HM	2	0.263±0.190	0.067±0.044	13.464±2.218	1.100±0.332	0.017±0.011	R	59.75±8.77	S	R	R	S	R	R	R	R	R	R
II-eA		A	5.8±2.2	0.0±0.0	0.003±0.001	HM	2	0.271±0.250	0.144±0.166	3.939±1.449	3.533±1.146	0.089±0.022	R	57.25±11.87	S	R	R	S	R	R	R	R	R	R
II-f	(1)	A	8.0±1.4	0.0±0.0	0.003±0.001	HM	2	0.094±0.068	0.085±0.047	18.129±3.715	3.202±1.048	0.021±0.002	R	31.40±15.8	S	R	R	S	R	R	R	R	R	R
II-g	(1)	A	10.8±3.0	0.0±0.0	0.007±0.013	HM	2	0.139±0.048	0.054±0.042	6.913±2.942	3.378±1.095	0.057±0.027	R	44.50±23.45	R	R	R	S	R	R	R	R	R	R
II-h	(1)	A	5.9±0.7	0.0±0.0	0.004±0.011	Absent	2	0.562±0.426	0.130±0.144	11.565±5.542	1.578±0.585	0.911±0.126	S	40.80±10.77	S	R	R	R	R	R	R	R	R	R
II-j2	(1)	A	9.1±0.4	0.0±0.0	0.003±0.001	HM	0.5	2.584±0.809	0.700±0.189	1.127±0.252	0.555±0.247	0.043±0.021	R	78.50±7.76	S	R	R	S	R	R	S	R	R	R
II-j4	(1)	A	9.1±0.5	0.0±0.0	0.003±0.001	HM	0.5	2.104±0.494	0.762±0.222	3.874±1.115	1.081±0.457	0.125±0.095	R	84.25±23.86	S	R	R	R	S	R	R	R	R	R
Total:
16	(157)
A - Lithuanian University of Health Sciences Kauno Klinikos Hospital; B - Vilnius University Emergency Hospital; C - Šiauliai Hospital;
VM and HM indicate profiles with the variable and high molecular mass CPS;																																													.
Capsule locus type (KL) is specified if it was identified;
SAT – salt aggregation test expressed as minimum ammonium sulfate concentration (M) required for bacterial aggregation;
Conspicuous values are shown in grey background;
Data are given as the mean ± SD from at least three independent experiments;
* data are given as the mean ± SE from at least three independent experiments;
Antibiotics are listed as abbreviations: SCF - cefoperazone-sulbactam; MEM - meropenem; TZP - tazobactam; SAM - ampicillin-sulbactam; CAZ - ceftazidime; GM - gentamicin; KAN - kanamicin; CIP - ciprofloxacin; IMP - imipenem; PIP - piperacillin;
Antibiotic concentrations (µg/ml) tested are listed next to abbreviations;
R and S represent resistant and sensitive strains, respectively;
nd - not done.
