# Supplementary material for: Surface-Related Features and Virulence Among Acinetobacter baumannii Clinical Isolates Belonging to International Clones I and II
Source: PubMed Central journal article supplement (PMC6331429; doi:10.3389/fmicb.2018.03116), 2019-01-08
Supplement: Table_2.pdf [file Table_2.pdf]

### Supplementary Material

## Surface-related features and virulence among *Acinetobacter baumannii* clinical isolates belonging to international clone I and II

Jūratė Skerniškytė\*, Renatas Krasauskas, Christine Péchoux, Saulius Kulakauskas, Julija Armalytė and Edita Sužiedėlienė

\* Correspondence: Jūratė Skerniškytė, [jurate.skerniskyte@gf.vu.lt](mailto:jurate.skerniskyte@gf.vu.lt)

**Supplementary Table S2.** Oligonucleotides, plasmids and strains used in this study.

| Primers                | Sequence (5' to 3')                                                | Product size (bp) | Purpose                                    | Source                      |
|------------------------|--------------------------------------------------------------------|-------------------|--------------------------------------------|-----------------------------|
| Eps1<br>Eps2           | CATTAATAAGCGCAATATTGAC<br>GTTATATAAAGCGCTTGAGAAACCCTTTGTGTATTTATCT | 1024              | <i>wza</i> upstream region amplification   | This study                  |
| Eps3<br>Eps4           | TCTCAAGCGCTTTATATAAC<br>GTCGAGGCATTTCTGTCCTAGAAGCACCTTTGCTGTC      | 684               | <i>wza</i> downstream region amplification | This study                  |
| Fjgms<br>Rjgms         | AGGACAGAAATGCCTCGAC<br>ATCTCGGCTTGAACGAATT                         | 854               | <i>aac(3)-I</i> amplification              | This study                  |
| EpgR                   | TGTATTCAGTTTTATATTCAGTATCAC                                        |                   | Conformation for <i>wza</i> deletion       | This study                  |
| P-Ab-ITSF<br>P-Ab-ITSB | CATTATCACGGTAATTAGTG<br>AGAGCACTGTGCACTTAAG                        | 208               | <i>A. baumannii</i> specie detection       | Chiang <i>et al.</i> , 2011 |

|                           |                                                        |         |                                               |                                                       |
|---------------------------|--------------------------------------------------------|---------|-----------------------------------------------|-------------------------------------------------------|
| gnaaF                     | CNTAYTAYYTDACNCATAAAGC                                 |         |                                               |                                                       |
| galuR                     | GTCAACNACBGTDACCATTTC                                  | various | K locus amplification and sequencing          | This study                                            |
| wzy11F<br>wzy11R          | AACGTTGGGACTATAGCAACAAAT<br>CCTGTTTGATGGGGTGGTCT       | 841     | <i>wzy11</i> detection/<br>KL2 identification | This study                                            |
| KL27F<br>KL27R            | GGAGACTGGCTGCAACCTTAT<br>AGAGCTGTGCACCCAAACAG          | 333     | KL27 identification                           | This study                                            |
| KL6F<br>KL6R              | CCACTTGGGGGAGTGTGATT<br>AACTTCCGCCCCCAACTTA            | 236     | KL6 identification                            | This study                                            |
| KL1F<br>KL1R              | ACGAAAACAACAGTTATGGCGA<br>ATGGGGGAGGTGTTACAGGT         | 193     | KL1 identification                            | This study                                            |
| KL40F<br>KL40R            | GGAAGTTAATCGTACTCTGCATTAT<br>ACACACCTGTAAGCTTGCCT      | 648     | KL40 identification                           | This study                                            |
| KL4F<br>KL4R              | AACGCGGCAAACCTTACTGGA<br>CGCCGATAAACCCACCTAAG          | 654     | KL4 identification                            | This study                                            |
| KL20F<br>KL20R            | GAACGCGGCAAACCTTACAGG<br>CAGGAGAGGGACCTGCAATC          | 934     | KL20 identification                           | This study                                            |
| RH1704<br>RH1705          | CCCTACAAGGTCTTGCCAAT<br>CCTCAGCCCGTACTTACAAC           | 2116    | OCL1 identification                           | Kenyon <i>et al.</i> , 2014, c                        |
| Citrato F1<br>Citrato R12 | AATTTACAGTGGCACATTAGGTCCC<br>GCAGAGATACCAGCAGAGATACACG | 722     | <i>gltA</i> amplification and sequencing      | <a href="https://pubmlst.org">https://pubmlst.org</a> |

|          |                               |     |                                           |                                                       |
|----------|-------------------------------|-----|-------------------------------------------|-------------------------------------------------------|
| gyrB_F   | TGAAGGCGGCTTATCTGAGT          | 594 | <i>gyrB</i> amplification and sequencing  | <a href="https://pubmlst.org">https://pubmlst.org</a> |
| gyrB_R   | GCTGGGTCTTTTTCCTGACA          |     |                                           |                                                       |
| RA1      | CCTGAATCTTCYGGTAAAAC          | 425 | <i>recA</i> amplification and sequencing  | <a href="https://pubmlst.org">https://pubmlst.org</a> |
| RA2      | GTTTCTGGGCTGCCAAACATTAC       |     |                                           |                                                       |
| gpi_F    | GAAATTTCCGGAGCTCACAA          | 456 | <i>gpi</i> amplification and sequencing   | <a href="https://pubmlst.org">https://pubmlst.org</a> |
| gpi_R    | TCAGGAGCAATACCCCACTC          |     |                                           |                                                       |
| GDHB1F   | GCT ACT TTT ATG CAA CAG AGC C | 774 | <i>gdhB</i> amplification and sequencing  | <a href="https://pubmlst.org">https://pubmlst.org</a> |
| GDHB775R | GTTGAGTTGGCGTATGTTGTGC        |     |                                           |                                                       |
| cpn60_F  | GGTGCTCAACTTGTTTCGTGA         | 640 | <i>cpn60</i> amplification and sequencing | <a href="https://pubmlst.org">https://pubmlst.org</a> |
| cpn60_R  | CACCGAAACCAGGAGCTTTA          |     |                                           |                                                       |
| rpoD-F   | ACCCGTGAAGGTGAAATCAG          | 672 | <i>rpoD</i> amplification and sequencing  | <a href="https://pubmlst.org">https://pubmlst.org</a> |
| rpoD-R   | TTCAGCTGGAGCTTTAGCAAT         |     |                                           |                                                       |

| Plasmids           | Relevant characteristics                                                                                                                                                                   | Source                |
|--------------------|--------------------------------------------------------------------------------------------------------------------------------------------------------------------------------------------|-----------------------|
| pUC19_sacB         | pUC19 derivative with <i>sacB</i> gene from <i>Bacillus sp.</i>                                                                                                                            | Laboratory collection |
| pUC19_sacB_UDwzaGm | pUC19_sacB derivative with upstream and downstream regions of <i>A. baumannii wza</i> gene and <i>aac(3)-I</i> gentamicin aminoglycoside cassette from clinical <i>A. baumannii</i> strain | This study            |

  

| Strains                          | Relevant characteristics                               | Source        |
|----------------------------------|--------------------------------------------------------|---------------|
| <i>Escherichia coli</i> OP50     | Wild type, bacterial food source for <i>C. elegans</i> | Brenner, 1974 |
| <i>Acinetobacter baylyi</i> ADP1 | Wild type                                              | ATCC 33305*   |

*Acinetobacter baumannii* III-a  
 $\Delta wza$

*wza* gene-negative mutant of *A. baumannii* strain III-a; markerless

This study

---

\*ATCC, American Type Culture Collection

Brenner, S. (1974). The genetics of *Caenorhabditis elegans*. *Genetic* 77, 71–94;

Chiang, M.C., Kuo, S.C., Chen, Y.C., Lee, Y.T., Chen, T.L., and Fung, C.P. (2011). Polymerase chain reaction assay for the detection of *Acinetobacter baumannii* in endotracheal aspirates from patients in the intensive care unit. *J Microbiol Immunol Infect.* 44(2), 106-10. doi: 10.1016/j.jmii.2010.04.003;

Kenyon, J.J., Nigro, S.J., and Hall, R.M. (2014). Variation in the OC Locus of *Acinetobacter baumannii* Genomes Predicts Extensive Structural Diversity in the Lipooligosaccharide. *PLoS ONE* 9(9):e107833. doi: 10.1371/journal.pone.0107833;

This publication made use of the *Acinetobacter baumannii* MLST website (<https://pubmlst.org/abaumannii/>) sited at the University of Oxford (Jolley & Maiden 2010, *BMC Bioinformatics*, 11:595). The development of this site has been funded by the Wellcome Trust.
